# Supplementary material for: Liver tissue fragments obtained from males are the most promising source of human hepatocytes for cell-based therapies – Flow cytometric analysis of albumin expression
Source: PubMed Central journal article supplement (PMC5549982; doi:10.1371/journal.pone.0182846), 2017-08-09
Supplement: pone.0182846.s001.pdf [file pone.0182846.s001.pdf]

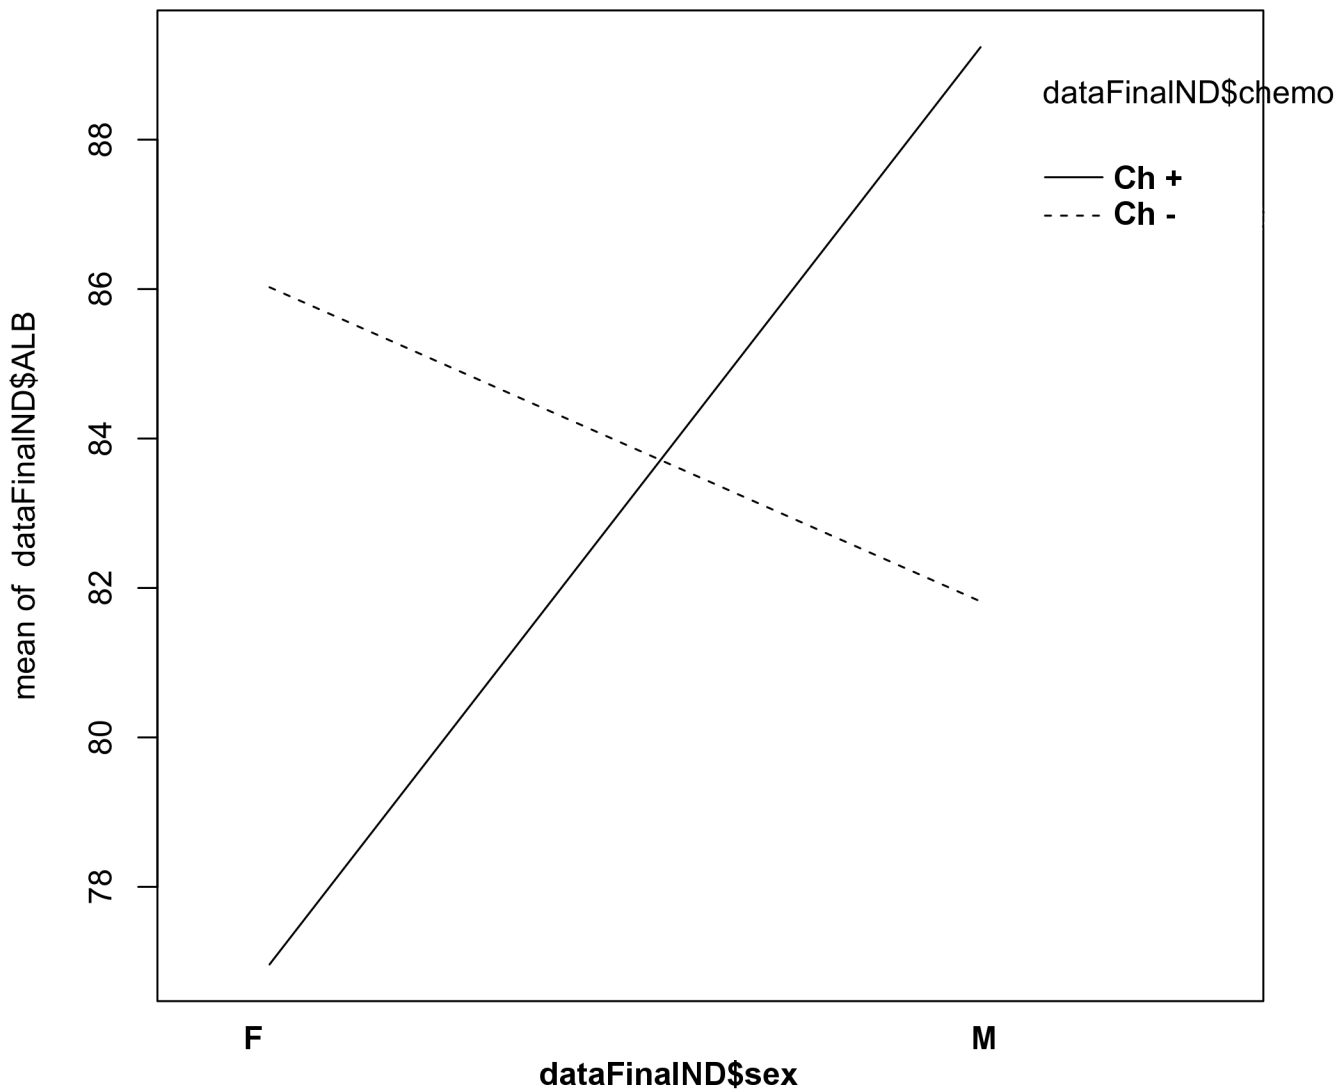

S1 Fig. Interaction plot for term "Sex/Chemotherapy".
